# Supplementary material
Source: publisher site journal article supplement (https://www.dovepress.com/get_supplementary_file.php?f=335964.docx)
Supplement: Supplementary file 2 [file get_supplementary_file.php]

Table S1

| Gene |  | Primers |
| --- | --- | --- |
| GAPDH | Forward | 5’-CTCCTCCTGTTCGACAGTCAGC-3’ |
| Reverse | 5’-CCCAATACGACCAAATCCGTT-3’ |
| YKL-40 | Forward | 5’-TTCCCCCACACAGTGCCTGTAGCGT-3’ |
| Reverse | 5’-AATGGGGTGTGGGGTTGGGTAGGGA-3’ |
